# Supplementary material
Source: Springer Nature journal article supplement (https://www.springermedizin.de/resource/supplementary/12990_2013_595_MOESM1_ESM.pdf/9613576)
Supplement: MOESM1 [file 9613576]

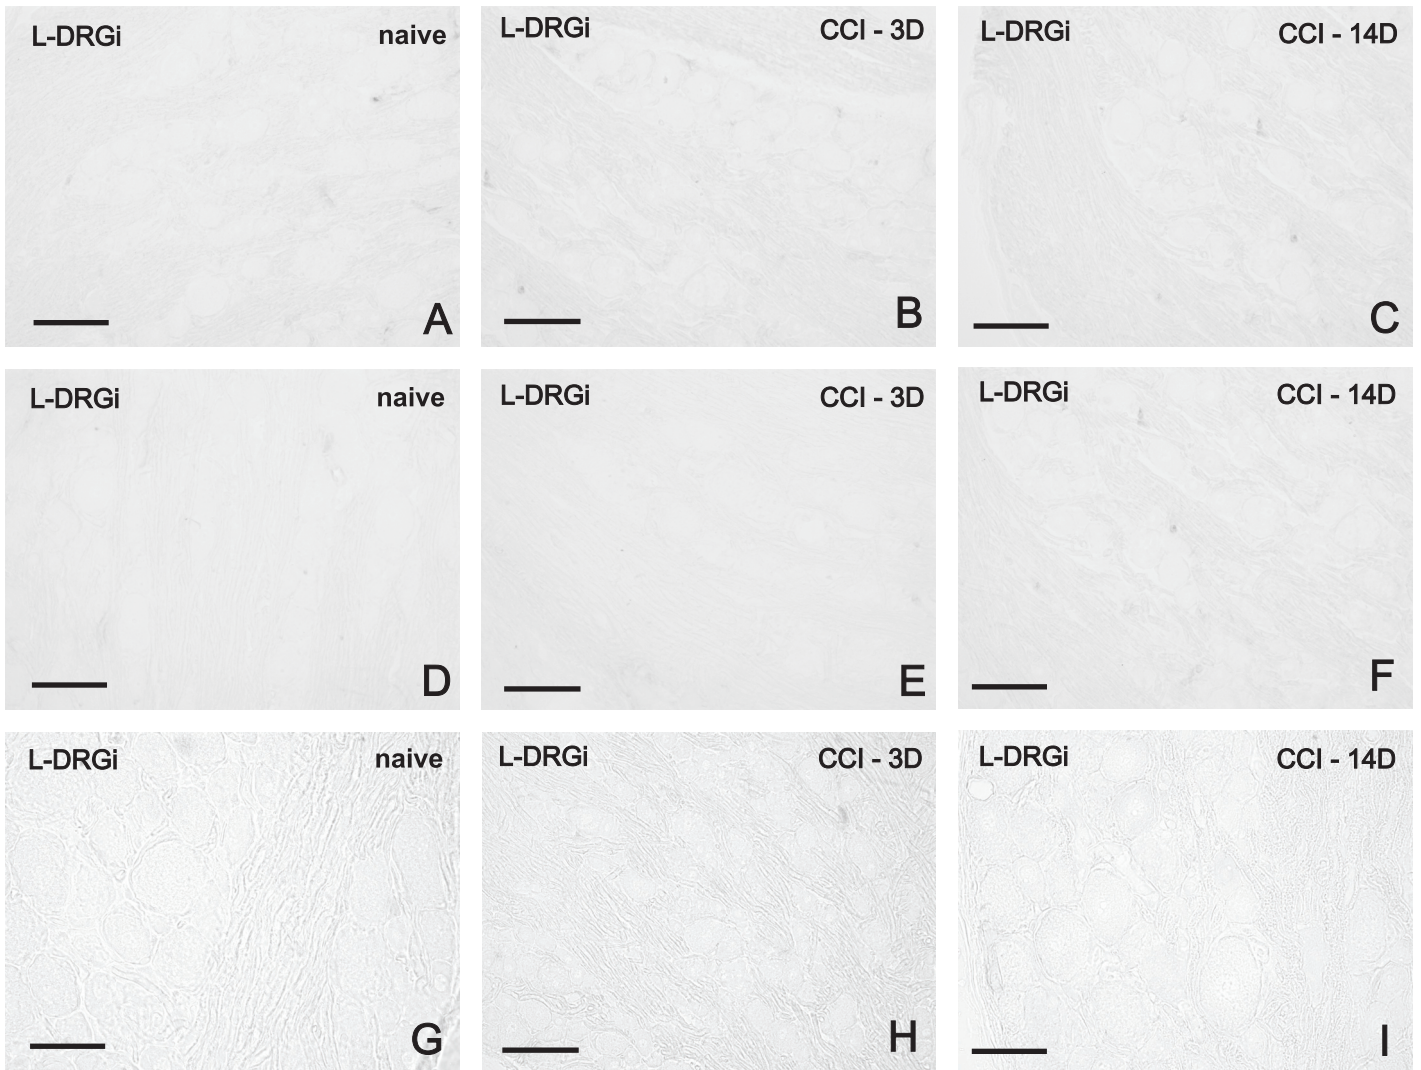

**Additional file 1 Control sections incubated with sense oligonucleotide probes displayed no color staining.** Detection by sense IL-6 probe (first lane, A-C), sense IL-6R probe (second lane, D-F), and sense GP130 probe (third lane, GH). Naïve DRG (first column, A, D, G) and DRG from CCI-operated (second and third rows, B, C, E, F, H, I) rats. Scale bars = 50  $\mu$ m.
